# Supplementary material for: A label-free visual platform for self-correcting logic gate construction and sensitive biosensing based on enzyme-mimetic coordination polymer nanoparticles
Source: Royal Society of Chemistry journal article supplement (doi:10.1039/c7tb00791d), 2017-01-01
Supplement: c7tb00791d1.pdf [file c7tb00791d1.pdf]

## **Supplementary Information**

### **A label-free visual platform for self-correcting logic gate construction and sensitive biosensing based on enzyme-mimetic coordination polymer nanoparticles**

Ting Hou, Tongxing Zhao, Wei Li, Feng Li\* and Panpan Gai\*

College of Chemistry and Pharmaceutical Sciences, Qingdao Agricultural University,

Qingdao 266109, P. R. China.

\* Corresponding authors. E-mail addresses: lifeng@qust.edu.cn (F. Li), ppgai@qau.edu.cn (P.P. Gai).

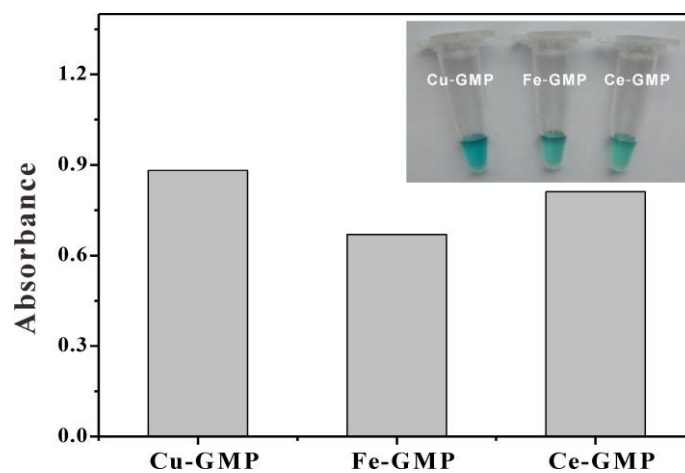

**Fig. S1.** Absorbance at 652 nm of  $\text{H}_2\text{O}_2$ -TMB system in the presence of different metal-GMP CPNs in Tris-HCl (pH 4.0); inset shows the photographs of the corresponding reaction solution.

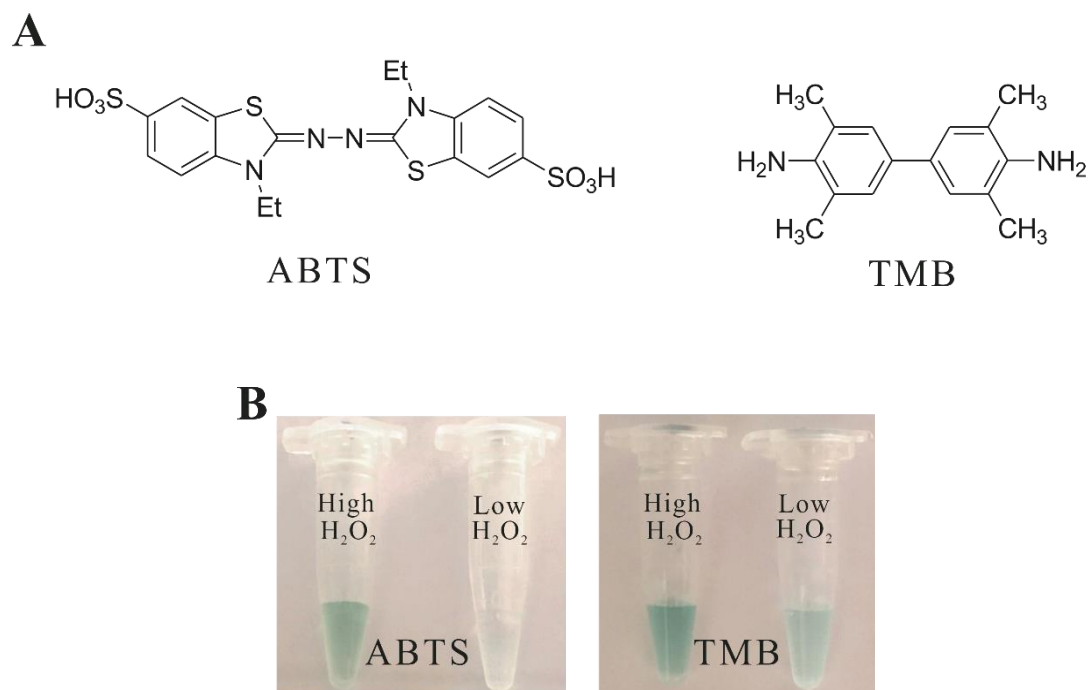

**Fig. S2.** (A) The chemical structures of 2,2'-azino-bis(3-ethylbenzothiazoline-6-sulfonic acid) (ABTS) and 3,3',5,5'-tetramethyl-benzidine (TMB). (B) Photographs of Cu-GMP CPNs-catalyzed reaction products using different substrates (TMB and ABTS) in the presence of 100  $\mu\text{M}$  (high) and 10  $\mu\text{M}$  (low)  $\text{H}_2\text{O}_2$ , respectively.

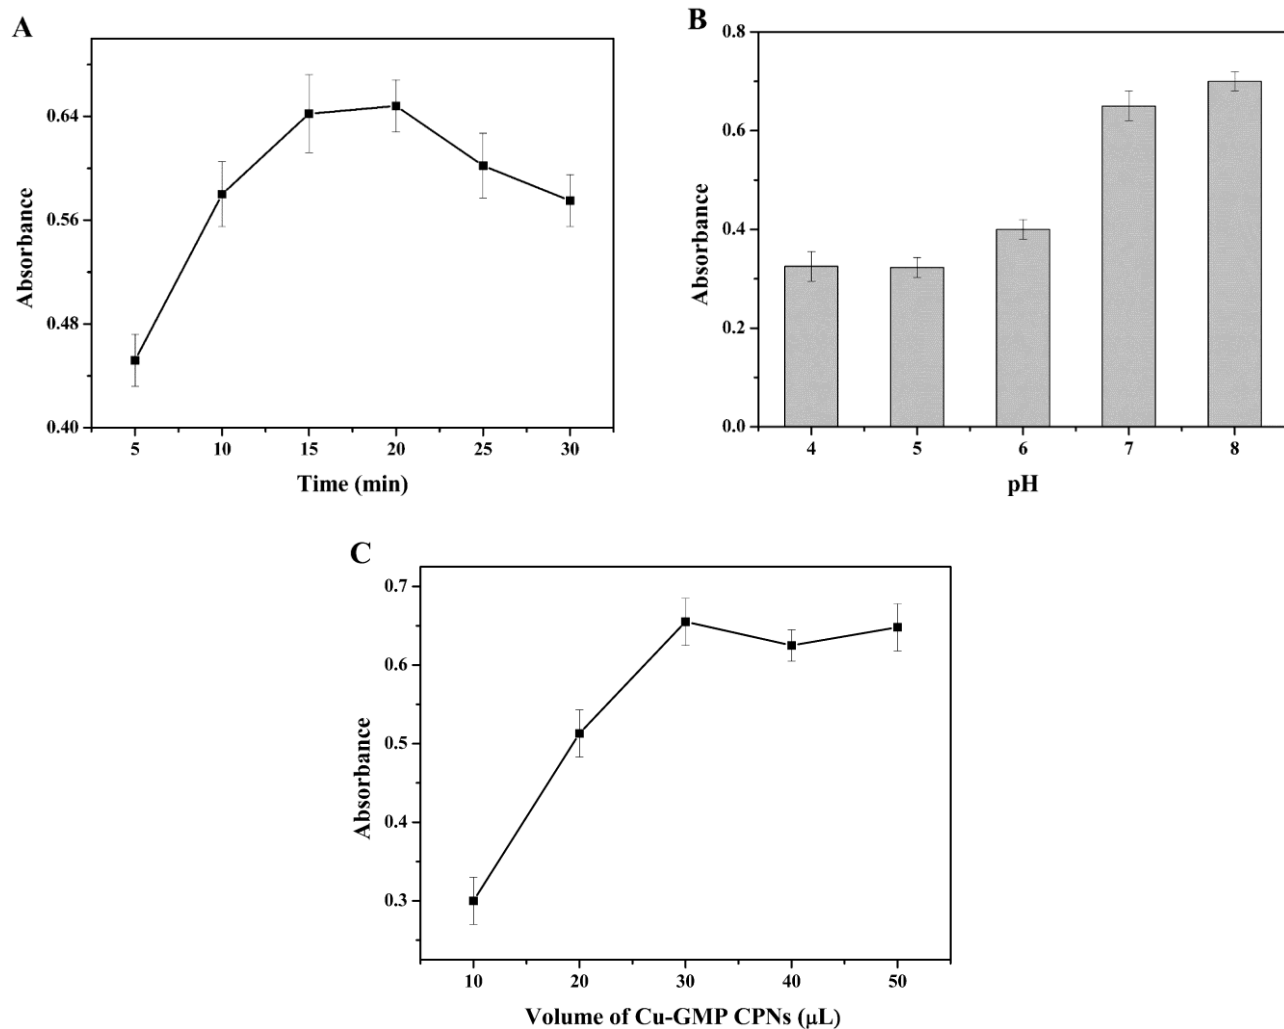

**Fig. S3.** Absorbance at 652 nm versus the reaction time (A), under different pH (B), and versus the volume of Cu-GMP CPNs stock solution (C). The error bars represent the standard deviation of three repetitive measurements.

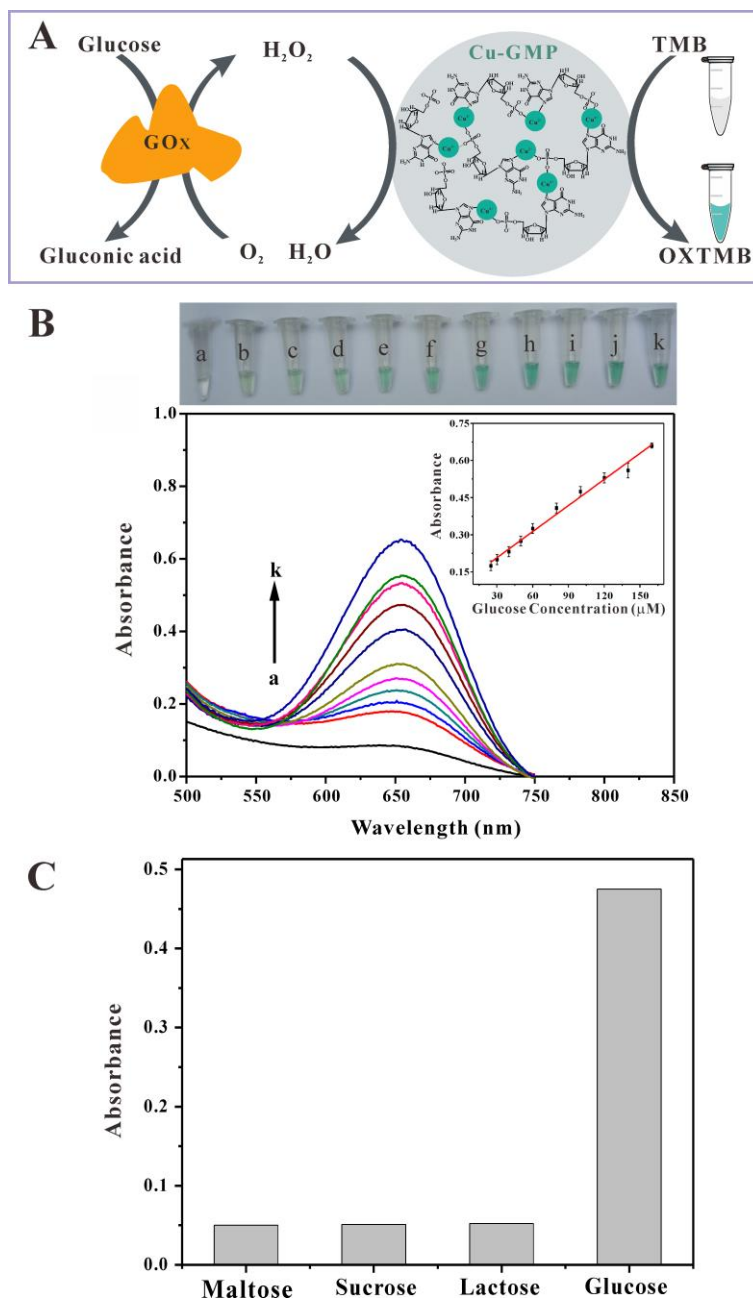

**Fig. S4.** (A) Schematic illustration of the principle of the colorimetric assay for glucose. (B) Photographs and UV-vis absorption spectra of the reaction system in the presence of glucose with different concentrations: (a) 0, (b) 25, (c) 30, (d) 40, (e) 50, (f) 60, (g) 80, (h) 100, (i) 120, (j) 140 and (k) 160  $\mu M$ . Inset shows the linear relationship between the absorbance at 652 nm and the glucose concentration ranging from 25 to 160  $\mu M$ . (C) Comparison of the absorbance at 652 nm of the sensing platform in the presence of glucose, maltose, sucrose and lactose, respectively, whose concentrations were all 100  $\mu M$ . The error bars represent the standard deviation of three repetitive measurements.

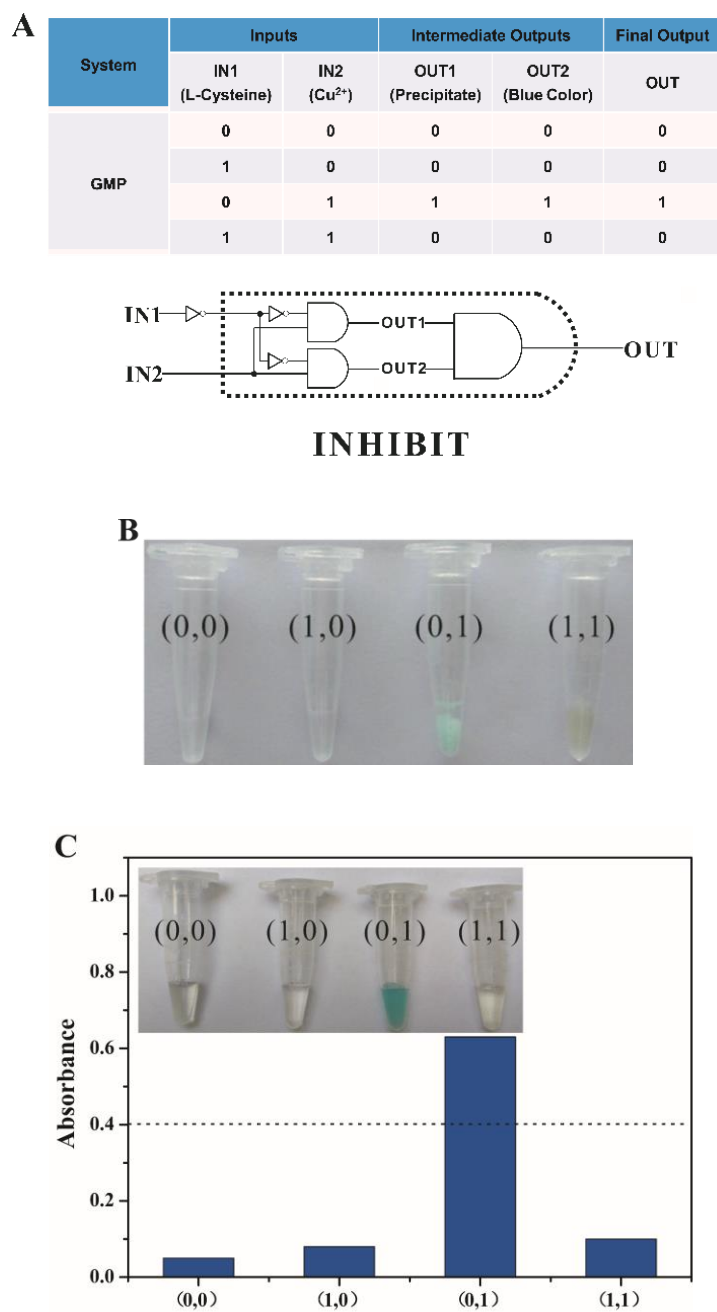

**Fig. S5.** INHIBIT logic gate: (A) truth table and logic symbol, (B) photographs indicating the precipitate formation, and (C) UV-vis responses and photographs indicating the color changes.

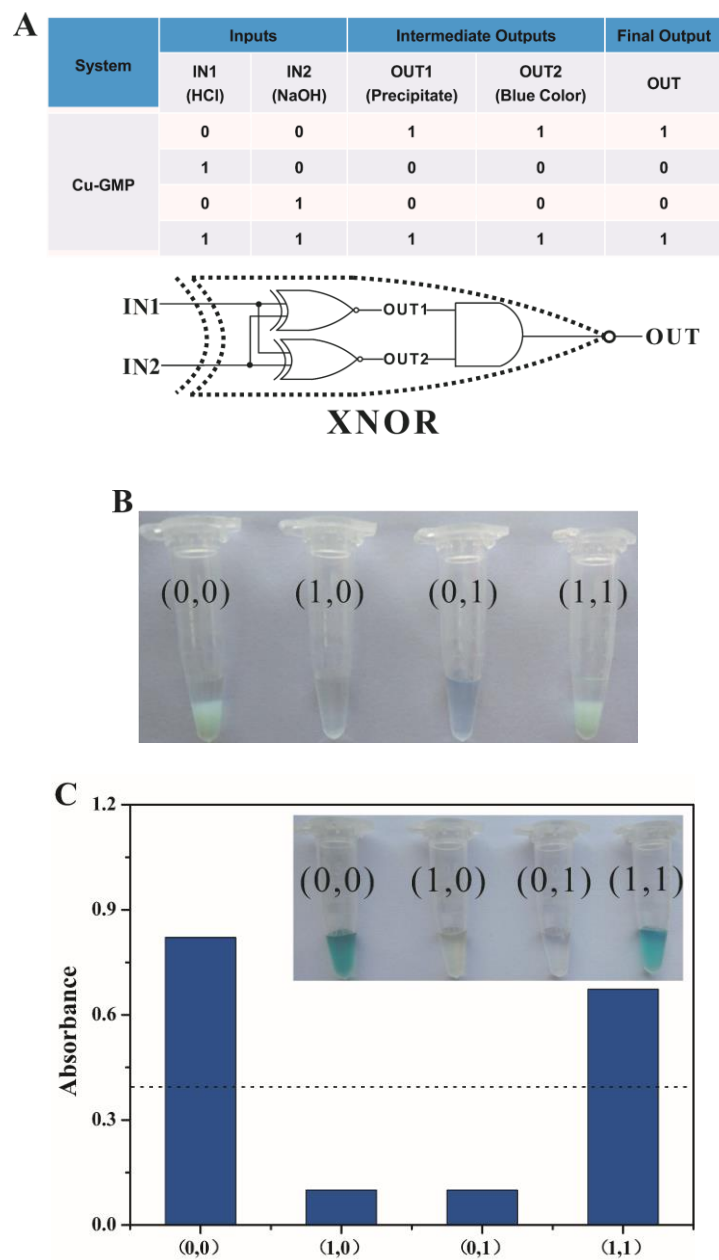

**Fig. S6.** XNOR logic gate: (A) truth table and logic symbol, (B) photographs indicating the precipitate formation, and (C) UV-vis responses and photographs indicating the color changes.
